# Supplementary material for: FXR Maintains the Intestinal Barrier and Stemness by Regulating CYP11A1-Mediated Corticosterone Synthesis in Biliary Obstruction Diseases
Source: MDPI journal article supplement (doi:10.3390/ijms241713494), 2023-08-30
Supplement: s1 [file s1]

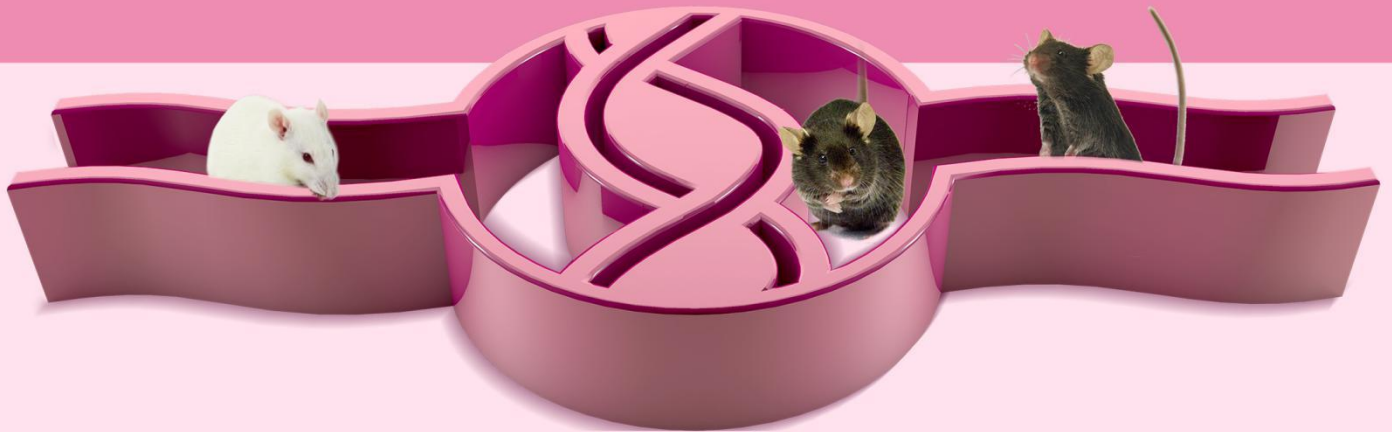

## Mouse Conditional Knockout User Manual

Quote: CKOAI190919YZ7-B

- Confidential -

## 1. Product Information

|               |                                     |
|---------------|-------------------------------------|
| Name          | C57BL/6N-Nr1h4 <sup>em1cyagen</sup> |
| Serial Number | CKOCMP-20186-Nr1h4-B6N-VA           |
| Gene          | Nr1h4                               |
| NCBI ID       | 20186                               |
| Strain        | C57BL/6N                            |
| Type          | conditional knockout                |

## 2. Targeting Strategy

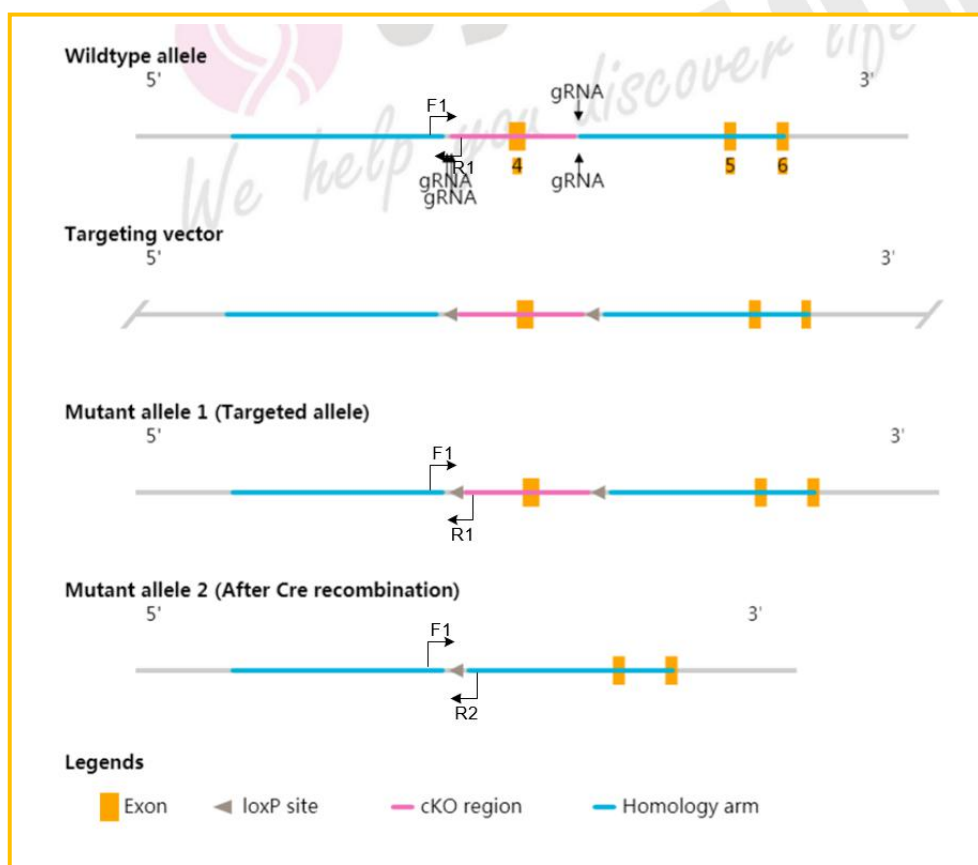

### 3. Genotyping strategy

Primers1: (Annealing Temperature 60.0 °C)

F1: 5'-GTATACAGGATACCCAAGGAGGC-3'

R1: 5'-TGGCATTATAAAGGAGAAGGCCAG-3'

Homozygotes: one band with 228 bp

Heterozygotes: two bands with 228 bp and 197 bp

Wildtype allele: one band with 197 bp

Primers2: (Annealing Temperature 60.0 °C)

PVillin-M-F : 5'-GTGTTTGGTTTGGTTTCCTCTGCATAAGA-3'

PVillin-M-R : 5'-GCAGGCAAATTTTGGTGTACGGTCA-3'

Cre amplicon: ~500 bp

The tissue-specific gene deletion can be confirmed by adding one additional primer to the PCR assay:

Primers4: (Annealing Temperature 60.0 °C)

F1: 5'-GTATACAGGATACCCAAGGAGGC-3'

R2: 5'-CTTTCCTTCTTAAGGGCAAGAGAG-3'

With Cre activity: one band with 230 bp

### 4. Expected Results

| Genotyping                                  | Primers1                                                                            | Primers2                                                                              |
|---------------------------------------------|-------------------------------------------------------------------------------------|---------------------------------------------------------------------------------------|
| Flox/Flox, PVillin-Cre:<br>Homozygotes, Cre | 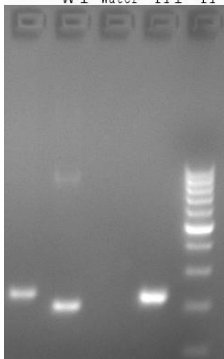 |  |

#### Note:

- 1) PCR was carried out in 25 µL volume for 35 cycles under standard conditions, with all two primers listed above added to each reaction.

2) DNAMarker: Thermo Scientific GeneRuler 100 bp DNA Ladder #SM0242

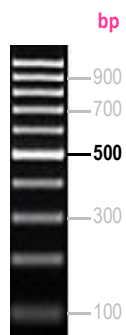

3) Controls used in PCR genotyping are:

- Water control: No DNA template added.
- Wildtype control: Mouse genomic DNA.
- Mutation control: Donor vector DNA.

## 5. PCR reaction

### 5.1 DNA Extraction

#### ➤ Method One:

We recommend that using TaKaRaMiniBEST Universal Genomic DNA Extraction kit (Ver.5.0\_Code No. 9765) to gain high purity of genomic DNA.

- a. Add 180  $\mu$ L of Buffer GL, 20  $\mu$ L of Proteinase K and 10  $\mu$ L of RNase A per tail piece (2-5 mm) in a microcentrifuge tube. Be careful not to cut too much tail.
- b. Incubate the tube at 56°C overnight.
- c. Spin in microcentrifuge at 12,000 rpm for 2 minutes to remove impurities.
- d. Add 200  $\mu$ L Buffer GB and 200  $\mu$ L absolute ethyl alcohol with sufficient mixing.
- e. Place the spin Column in a collection tube. Apply the sample to the spin and centrifuge at 12,000 rpm for 2 min. Discard flow-through.
- f. Add 500  $\mu$ L Buffer WA to the spin column and centrifuge at 12,000 rpm for 1 min. Discard flow-through.
- g. Add 700  $\mu$ L Buffer WB to the spin column and centrifuge at 12,000 rpm for 1 min. Discard flow-through. (Note: Make sure the Buffer WB has been premixed with 100% ethanol. When adding Buffer WB, add to the tube wall to wash off the residual salt.)
- h. Repeat step g.
- i. Place the spin Column in a collection tube and centrifuge at 12,000 rpm for 2 min.
- j. Place the spin Column in a new 1.5ml tube. Add 50~200  $\mu$ L sterilized water or elution buffer to the center of the column membrane and let the column stand 5min. (Note: Heating sterilized water or elution buffer up to 65°C can increase the yield of elution.)
- k. To elute DNA, centrifuge the column at 12,000 rpm for 2 min. To increase the yield of DNA, add the flow-through and/or 50~200  $\mu$ L sterilized water or elution buffer to the center of the spin column membrane and let the column stand 5 min. Centrifuge at 12,000 rpm for 2 min.
- l. Quantify to genomic DNA. Eluted genomic DNA can be quantified by electrophoresis or electrophoresis.

#### ➤ Method Two:

A low-cost and sample method to gain rough genomic DNA.

- a. Add 100  $\mu$ L of tail digestion buffer per tail piece (2-5 mm) in a microcentrifuge tube. Be careful not to cut too much tail.
- b. Incubate the tube at 56°C overnight.
- c. Incubate the tube at 98°C for 13 minutes to denature the Proteinase K.
- d. Spin in microcentrifuge at top speed for 15 minutes. Use an aliquot of supernatant straight from the tube (1  $\mu$ L in a 12.5  $\mu$ L reaction) for PCR.

Final concentration of tail digestion buffer:

- 50 mM KCl
- 10 mM Tris-HCl (pH 9.0)

- 0.1 % Triton X-100
- 0.4 mg/mL Proteinase K

## 5.2 PCR Mixture (primer concentration: 10 $\mu$ M ):

| Component          | x1           |
|--------------------|--------------|
| ddH <sub>2</sub> O | 9.0 $\mu$ l  |
| Product primer F   | 1.0 $\mu$ l  |
| Product primer R   | 1.0 $\mu$ l  |
| Premix Taq         | 12.5 $\mu$ l |
| DNA                | 1.5 $\mu$ l  |
| Total              | 25 $\mu$ l   |

## 5.3 PCR Reaction Conditions:

| Step                 | Temp. | Time  | Cycles |
|----------------------|-------|-------|--------|
| Initial denaturation | 94 °C | 3 min |        |
| Denaturation         | 94 °C | 30 s  | 35 x   |
| Annealing            | 60 °C | 35 s  |        |
| Extension            | 72 °C | 35 s  |        |
| Additional extension | 72 °C | 5 min |        |

## 5.4 Relevant Reagents:

|                                      |                                                       |
|--------------------------------------|-------------------------------------------------------|
| <b>TrizmaHydrochloride Solution</b>  | Sigma, Cat. No. T2663                                 |
| <b>Proteinase K</b>                  | Merck, Cat. No. MK539480                              |
| <b>Triton X-100</b>                  | Sigma, T8787-50 mL                                    |
| <b>2 × Taq Master Mix (Dye Plus)</b> | Vazyme, P222                                          |
| <b>Agarose</b>                       | BIOWEST AGAROSE, REGULAR                              |
| <b>DNA Marker</b>                    | Thermo Scientific GeneRuler 100 bp DNA Ladder #SM0242 |
| <b>0.5×TBE</b>                       | Tris Bio Basic Inc, TBO194-500g                       |
|                                      | EDTA Shanghai Sangon, 0105-500g                       |
|                                      | Boric Acid, Shanghai Sangon, 0588-500g                |
